# Supplementary material
Source: Springer Nature journal article supplement (https://www.springermedizin.de/resource/supplementary/12884_2011_453_MOESM3_ESM.pdf/9457698)

## Emergency Care Decision Maker

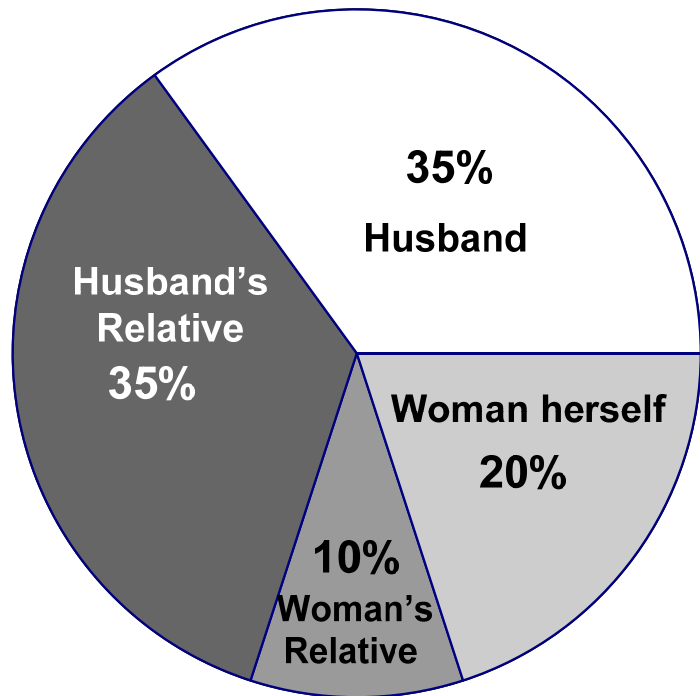

## Main Initiator of Referral

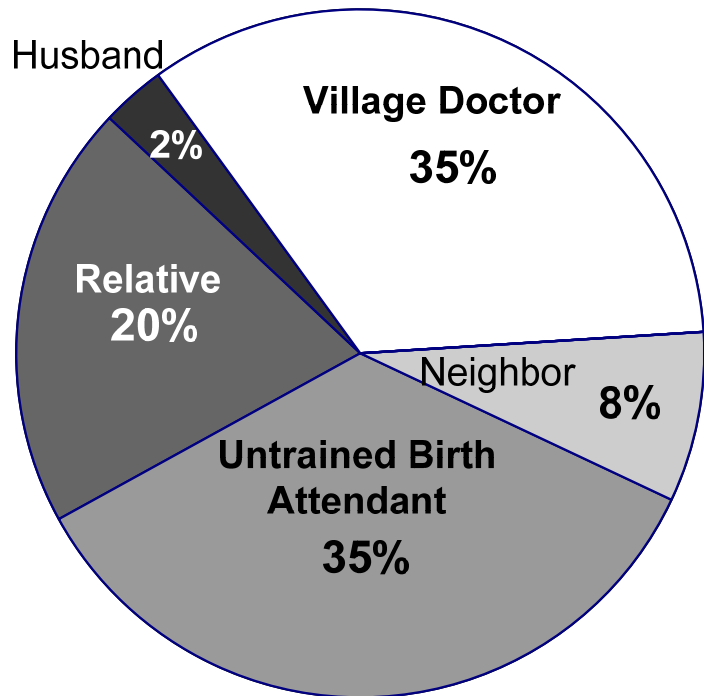

Supplement: MOESM3 [file 9457698]
